# Supplementary material for: Estimating global injuries morbidity and mortality: methods and data used in the Global Burden of Disease 2017 study
Source: PubMed Central journal article supplement (PMC7571362; doi:10.1136/injuryprev-2019-043531), 2020-08-24
Supplement: injuryprev-2019-043531supp002.pdf [file injuryprev-2019-043531supp002.pdf]

| <b>Appendix Table 1: Country-level GBD location hierarchy</b> |
|---------------------------------------------------------------|
| <b>Central Europe, Eastern Europe, and Central Asia</b>       |
| <b>Central Asia</b>                                           |
| Armenia                                                       |
| Azerbaijan                                                    |
| Georgia                                                       |
| Kazakhstan                                                    |
| Kyrgyzstan                                                    |
| Mongolia                                                      |
| Tajikistan                                                    |
| Turkmenistan                                                  |
| Uzbekistan                                                    |
| <b>Central Europe</b>                                         |
| Albania                                                       |
| Bosnia and Herzegovina                                        |
| Bulgaria                                                      |
| Croatia                                                       |
| Czech Republic                                                |
| Hungary                                                       |
| Macedonia                                                     |
| Montenegro                                                    |
| Poland                                                        |
| Romania                                                       |
| Serbia                                                        |
| Slovakia                                                      |

|                                  |
|----------------------------------|
| Slovenia                         |
| <b>Eastern Europe</b>            |
| Belarus                          |
| Estonia                          |
| Latvia                           |
| Lithuania                        |
| Moldova                          |
| Russia                           |
| Ukraine                          |
| <b>High-income</b>               |
| <b>Australasia</b>               |
| Australia                        |
| New Zealand                      |
| <b>High-income Asia-Pacific</b>  |
| Brunei                           |
| Japan                            |
| South Korea                      |
| Singapore                        |
| <b>High-income North America</b> |
| Canada                           |
| Greenland                        |
| USA                              |
| <b>Southern Latin America</b>    |
| Argentina                        |
| Chile                            |

|                                    |
|------------------------------------|
| Uruguay                            |
| <b>Western Europe</b>              |
| Andorra                            |
| Austria                            |
| Belgium                            |
| Cyprus                             |
| Denmark                            |
| Finland                            |
| France                             |
| Germany                            |
| Greece                             |
| Iceland                            |
| Ireland                            |
| Israel                             |
| Italy                              |
| Luxembourg                         |
| Malta                              |
| Netherlands                        |
| Norway                             |
| Portugal                           |
| Spain                              |
| Sweden                             |
| Switzerland                        |
| United Kingdom                     |
| <b>Latin America and Caribbean</b> |

|                                  |
|----------------------------------|
| <b>Andean Latin America</b>      |
| Bolivia                          |
| Ecuador                          |
| Peru                             |
| <b>Caribbean</b>                 |
| Antigua and Barbuda              |
| The Bahamas                      |
| Barbados                         |
| Belize                           |
| Bermuda                          |
| Cuba                             |
| Dominica                         |
| Dominican Republic               |
| Grenada                          |
| Guyana                           |
| Haiti                            |
| Jamaica                          |
| Puerto Rico                      |
| Saint Lucia                      |
| Saint Vincent and the Grenadines |
| Suriname                         |
| Trinidad and Tobago              |
| Virgin Islands                   |
| <b>Central Latin America</b>     |
| Colombia                         |

|                                     |
|-------------------------------------|
| Costa Rica                          |
| El Salvador                         |
| Guatemala                           |
| Honduras                            |
| Mexico                              |
| Nicaragua                           |
| Panama                              |
| Venezuela                           |
| <b>Tropical Latin America</b>       |
| Brazil                              |
| Paraguay                            |
| <b>North Africa and Middle East</b> |
| <b>North Africa and Middle East</b> |
| Afghanistan                         |
| Algeria                             |
| Bahrain                             |
| Egypt                               |
| Iran                                |
| Iraq                                |
| Jordan                              |
| Kuwait                              |
| Lebanon                             |
| Libya                               |
| Morocco                             |
| Palestine                           |

|                                               |
|-----------------------------------------------|
| Oman                                          |
| Qatar                                         |
| Saudi Arabia                                  |
| Sudan                                         |
| Syria                                         |
| Tunisia                                       |
| Turkey                                        |
| United Arab Emirates                          |
| Yemen                                         |
| <b>South Asia</b>                             |
| <b>South Asia</b>                             |
| Bangladesh                                    |
| Bhutan                                        |
| India                                         |
| Nepal                                         |
| Pakistan                                      |
| <b>Southeast Asia, East Asia, and Oceania</b> |
| <b>East Asia</b>                              |
| China                                         |
| North Korea                                   |
| Taiwan (Province of China)                    |
| <b>Oceania</b>                                |
| American Samoa                                |
| Federated States of Micronesia                |
| Fiji                                          |

|                                   |
|-----------------------------------|
| Guam                              |
| Kiribati                          |
| Marshall Islands                  |
| Northern Mariana Islands          |
| Papua New Guinea                  |
| Samoa                             |
| Solomon Islands                   |
| Tonga                             |
| Vanuatu                           |
| <b>Southeast Asia</b>             |
| Cambodia                          |
| Indonesia                         |
| Laos                              |
| Malaysia                          |
| Maldives                          |
| Mauritius                         |
| Myanmar                           |
| Philippines                       |
| Sri Lanka                         |
| Seychelles                        |
| Thailand                          |
| Timor-Leste                       |
| Vietnam                           |
| <b>Sub-Saharan Africa</b>         |
| <b>Central sub-Saharan Africa</b> |

|                                    |
|------------------------------------|
| Angola                             |
| Central African Republic           |
| Congo (Brazzaville)                |
| DR Congo                           |
| Equatorial Guinea                  |
| Gabon                              |
| <b>Eastern sub-Saharan Africa</b>  |
| Burundi                            |
| Comoros                            |
| Djibouti                           |
| Eritrea                            |
| Ethiopia                           |
| Kenya                              |
| Madagascar                         |
| Malawi                             |
| Mozambique                         |
| Rwanda                             |
| Somalia                            |
| South Sudan                        |
| Tanzania                           |
| Uganda                             |
| Zambia                             |
| <b>Southern sub-Saharan Africa</b> |
| Botswana                           |
| Lesotho                            |



|                                   |
|-----------------------------------|
| Namibia                           |
| South Africa                      |
| Swaziland                         |
| Zimbabwe                          |
| <b>Western sub-Saharan Africa</b> |
| Benin                             |
| Burkina Faso                      |
| Cameroon                          |
| Cape Verde                        |
| Chad                              |
| Cote d'Ivoire                     |
| The Gambia                        |
| Ghana                             |
| Guinea                            |
| Guinea-Bissau                     |
| Liberia                           |
| Mali                              |
| Mauritania                        |
| Niger                             |
| Nigeria                           |
| Sao Tome and Principe             |
| Senegal                           |
| Sierra Leone                      |
| Togo                              |
